# Supplementary material for: Mild Traumatic Brain Injury in Yucatan Minipigs: Assessing Changes in Approachability/Sociability and Mechanical Nociception Following Central Fluid Percussion Injury
Source: Preprints.org preprint supplement (doi:10.20944/preprints202409.1898.v1), 2024-09-24
Supplement: Supplementary file 1 [file supplementary]

## Sheet: FHAT Supp Table
Case	Sex	Injury	Experimenter Group(Known/Unknown)	Pre	1D	2D	3D	1W
6896	Male	1.64	Known	4	3	1	3	2
			Unknown	4	4	2	2	1
6840	Female	Sham	Known	6	4	5	5	5
			Unknown	6	4	4	5	6
6800	Female	1.47	Known	6	6	5	5	5
			Unknown	6	6	6	5	5
6799	Female	Sham	Known	6	4	6	6	6
			Unknown	6	4	6	5	6
6796	Female	2.07	Known	6	3	5	4	5
			Unknown	6	3	5	2	4
6793	Female	1.61	Known	6	2	3	1	1
			Unknown	6	2	1	2	1
6786	Female	Sham	Known	6	2	4	5	5
			Unknown	3	2	2	4	5
6759	Female	2.07	Known	6	3	4	5	5
			Unknown	6	6	3	5	6
6755	Female	1.34	Known	6	4	6	3	6
			Unknown	2	3	6	4	4
6752	Female	Sham	Known	6	6	3	6	6
			Unknown	6	6	3	3	6
6537	Male	1.64	Known	6	6	6	6	6
			Unknown	6	4	6	6	6
6535	Male	Sham	Known	6	2	1	1	6
			Unknown	6	3	2	1	6
6526	male	1.75	Known	6	4	5	6	6
			Unknown	6	2	4	4	3
6445	male	sham	Known	4	1	1	1	3
			Unknown	6	1	1	1	3
6355	male	sham	Known	6	6	3	4	6
			Unknown	6	6	3	3	6
6353	male	2.51	Known	5	6	6	6	6
			Unknown	4	6	6	6	6
6352	male	2.04	Known	6	0	0	6	0
			Unknown	6	5	0	5	0
6346	male	Sham	Known	6	6	5	6	5
			Unknown	6	5	5	5	5
6335	male	Sham	Known	6	5	6	6	6
			Unknown	1	5	6	6	6
6321	Female	1.83	Known	6	6	6	6	6
			Unknown	6	6	6	6	6
6318	Female	Sham	Known	6	6	6	6	6
			Unknown	6	6	6	6	6
6317	Female	Sham	Known	6	6	6	6	6
			Unknown	6	6	6	6	6
6310	male	1.8	Known	6	6	6	6	6
			Unknown	6	6	6	6	6
6214	Female	1.9	Known	6	6	6	6	6
			Unknown	6	6	6	6	4
	mean	1.82077		5.5625
	median	1.8		6
